# Supplementary material for: Effects of exoskeletal gait assistance on the recovery motion following tripping
Source: PLoS One. 2020 Feb 24;15(2):e0229150. doi: 10.1371/journal.pone.0229150 (PMC7039667; doi:10.1371/journal.pone.0229150)
Supplement: S1 Dataset — (CSV) [file pone.0229150.s001.csv]

WS_F	StT_F	TrL_F	ToH_F	KA_F	StL_F	CVx_F	CVz_F	MoS_F	CPz_F	WS_S	StT_S	TrL_S	ToH_S	KA_S	StL_S	CVx_S	CVz_S	MoS_S	CPz_S
0.86	0.96	0.91	0.32	27.36	0.67	1.07	-0.30	-0.02	0.53	1.00	0.61	0.75	0.09	-0.35	0.55	1.01	-0.14	0.02	0.56
1.00	0.88	0.84	0.36	41.50	0.68	1.20	-0.55	-0.04	0.55	1.03	0.60	0.84	0.12	-2.20	0.62	1.00	-0.24	0.11	0.56
0.99	0.92	0.86	0.38	56.72	0.63	1.14	-0.44	0.07	0.55	0.74	0.65	0.70	0.11	-9.29	0.50	0.57	-0.08	0.05	0.57
0.96	0.94	0.76	0.36	42.66	0.65	1.04	-0.58	-0.07	0.56	1.06	0.56	0.83	0.12	3.21	0.61	1.05	-0.20	0.06	0.56
1.06	0.86	0.81	0.35	44.63	0.67	1.26	-0.68	-0.05	0.54	1.07	0.50	0.78	0.12	12.58	0.57	1.05	-0.28	0.03	0.57
0.96	0.85	0.74	0.26	45.45	0.62	1.12	-0.47	0.04	0.55	0.74	0.72	0.70	0.17	2.50	0.49	0.57	-0.15	0.09	0.57
1.05	0.72	0.75	0.32	27.07	0.71	1.07	-0.80	-0.01	0.51	0.64	0.67	0.58	0.15	11.32	0.45	0.49	-0.20	0.03	0.53
1.00	0.70	0.52	0.26	22.38	0.63	1.09	-0.71	-0.09	0.54	0.89	0.53	0.63	0.18	9.08	0.50	0.83	-0.36	-0.03	0.55
0.94	0.66	0.72	0.40	34.04	0.55	1.09	-0.44	-0.19	0.55	0.96	0.59	0.72	0.16	3.77	0.59	1.12	-0.21	-0.06	0.56
1.05	0.61	0.77	0.40	34.11	0.56	1.05	-0.48	-0.14	0.55	0.92	0.55	0.70	0.20	10.18	0.56	0.95	-0.30	-0.02	0.56
1.13	0.66	0.63	0.27	28.26	0.65	1.33	-0.49	-0.13	0.54	1.01	0.58	0.83	0.20	12.56	0.67	1.00	-0.21	-0.06	0.55
1.27	0.72	0.72	0.29	34.83	0.73	1.31	-0.46	-0.03	0.52	0.99	0.69	0.95	0.24	12.83	0.63	0.97	-0.33	0.09	0.54
1.19	0.67	0.67	0.28	34.39	0.65	1.21	-0.42	-0.01	0.53	1.00	0.70	0.99	0.26	14.34	0.64	1.01	-0.31	0.05	0.54
1.14	0.69	0.71	0.29	17.55	0.60	1.22	-0.39	-0.05	0.53	0.97	0.55	0.76	0.18	12.73	0.51	0.90	-0.33	0.08	0.55
1.09	0.63	0.71	0.31	19.12	0.57	1.12	-0.41	0.01	0.53	0.91	0.61	0.76	0.15	6.25	0.52	0.81	-0.26	0.11	0.54
1.22	0.76	0.56	0.29	36.07	0.59	1.17	-0.71	-0.19	0.52	1.08	0.49	0.82	0.15	-6.91	0.53	1.21	-0.40	-0.02	0.53
1.13	0.65	0.68	0.30	35.29	0.54	1.12	-0.39	-0.11	0.54	1.14	0.58	0.90	0.23	8.45	0.60	1.22	-0.38	0.03	0.53
1.01	0.61	0.78	0.32	14.18	0.49	1.00	-0.40	0.02	0.53	0.80	0.62	0.70	0.22	18.92	0.46	0.78	-0.33	0.14	0.55
0.96	0.61	0.60	0.26	12.53	0.53	1.06	-0.33	-0.02	0.53	0.95	0.59	0.71	0.22	7.78	0.49	1.01	-0.29	-0.06	0.54
1.03	0.56	0.54	0.27	16.01	0.62	0.99	-0.40	-0.06	0.54	0.91	0.65	0.71	0.29	9.36	0.60	1.02	-0.36	-0.06	0.54
1.07	0.58	0.56	0.29	16.02	0.60	1.23	-0.45	-0.15	0.53	0.87	0.55	0.71	0.25	8.97	0.63	0.81	-0.36	0.02	0.54
1.07	0.58	0.66	0.27	5.35	0.57	1.16	-0.42	-0.01	0.54	0.94	0.59	0.71	0.21	7.76	0.53	0.84	-0.23	0.07	0.55
0.99	0.69	0.59	0.27	21.98	0.58	0.79	-0.44	-0.01	0.52	0.92	0.60	0.72	0.20	13.46	0.54	1.11	-0.30	-0.07	0.51
1.06	0.65	0.54	0.26	19.31	0.56	1.04	-0.36	-0.10	0.52	1.01	0.50	0.63	0.14	-0.17	0.50	1.08	-0.31	-0.08	0.52
1.06	0.73	0.52	0.24	23.16	0.66	1.15	-0.22	-0.04	0.51	0.66	0.75	0.75	0.27	19.44	0.51	0.74	-0.22	-0.12	0.51
1.04	0.64	0.72	0.38	27.69	0.58	0.93	-0.37	-0.12	0.51	0.97	0.55	0.63	0.15	3.23	0.49	1.11	-0.35	-0.11	0.51
0.98	0.63	0.67	0.32	27.77	0.58	0.77	-0.28	0.08	0.52	0.68	0.78	0.61	0.14	-1.12	0.47	0.79	-0.27	-0.06	0.51
0.91	0.61	0.49	0.28	25.10	0.53	0.79	-0.28	-0.07	0.52	0.76	0.65	0.59	0.17	0.04	0.45	0.87	-0.17	-0.09	0.52
1.17	0.65	0.68	0.26	15.20	0.66	1.28	-0.42	-0.08	0.53	0.95	0.55	0.75	0.12	-3.69	0.57	0.89	-0.10	-0.11	0.54
0.91	0.75	0.81	0.42	41.25	0.54	0.90	-0.39	-0.04	0.53	0.91	0.56	0.69	0.14	-2.97	0.54	1.03	-0.24	0.04	0.54
1.06	0.72	0.79	0.37	38.91	0.65	1.08	-0.46	-0.01	0.52	0.99	0.60	0.79	0.14	-2.69	0.62	0.99	-0.23	0.05	0.53
1.10	0.65	0.68	0.33	35.67	0.61	1.01	-0.33	-0.07	0.54	0.82	0.57	0.70	0.10	-32.57	0.56	0.83	-0.11	0.06	0.54
1.02	0.67	0.75	0.37	38.88	0.57	1.04	-0.40	-0.06	0.54	0.92	0.67	0.79	0.12	-12.24	0.62	0.94	-0.09	0.07	0.55
1.10	0.70	0.75	0.21	7.65	0.55	1.05	-0.47	0.01	0.48	1.16	0.54	0.84	0.23	12.93	0.56	1.19	-0.39	-0.01	0.50
1.01	0.73	0.79	0.34	27.95	0.52	1.04	-0.66	-0.04	0.46	0.99	0.57	0.77	0.21	11.81	0.51	0.99	-0.30	0.03	0.50
1.07	0.63	0.66	0.32	20.92	0.44	1.07	-0.35	-0.15	0.49	1.03	0.55	0.69	0.13	-5.27	0.47	1.15	-0.33	-0.07	0.50
1.11	0.61	0.67	0.35	25.23	0.55	1.22	-0.41	-0.09	0.49	1.01	0.65	0.88	0.19	9.91	0.61	0.99	-0.37	0.09	0.50
1.09	0.67	0.59	0.31	25.20	0.51	1.13	-0.46	-0.14	0.48	0.83	0.54	0.64	0.19	5.85	0.43	0.68	-0.15	0.08	0.51
1.13	0.70	0.73	0.32	18.68	0.50	1.28	-0.43	-0.20	0.48	0.78	0.54	0.61	0.13	-0.44	0.42	0.54	-0.17	0.11	0.50
1.08	0.76	0.64	0.26	21.77	0.52	1.37	-0.35	-0.22	0.48	0.88	0.51	0.68	0.12	-6.80	0.47	0.66	-0.14	0.09	0.51
1.02	0.65	0.63	0.33	29.15	0.52	1.09	-0.24	-0.21	0.51	0.96	0.39	0.48	0.10	-11.56	0.38	0.90	-0.27	-0.20	0.53
1.00	0.58	0.55	0.20	14.28	0.48	1.07	-0.07	-0.25	0.53	1.27	0.37	0.58	0.13	-10.02	0.46	1.32	-0.55	-0.18	0.52
1.06	0.69	0.49	0.31	30.52	0.55	0.98	-0.54	-0.16	0.51	0.78	0.42	0.50	0.10	-9.03	0.41	0.78	-0.13	-0.09	0.53
1.00	0.67	0.49	0.25	27.52	0.50	1.04	-0.25	-0.16	0.52	1.13	0.45	0.61	0.11	-19.41	0.49	1.15	-0.39	-0.19	0.53
1.13	0.71	0.55	0.27	20.14	0.59	1.27	-0.21	-0.25	0.52	1.01	0.41	0.57	0.08	-33.41	0.46	1.02	-0.12	-0.16	0.54
0.78	0.79	0.67	0.32	37.85	0.56	0.89	-0.29	0.04	0.52	0.95	0.68	0.80	0.19	20.40	0.58	1.09	-0.33	0.03	0.52
0.72	0.78	0.74	0.29	37.90	0.52	0.77	-0.27	0.06	0.51	0.68	0.77	0.60	0.09	-13.62	0.44	0.70	-0.18	0.05	0.53
0.77	0.87	0.64	0.29	33.88	0.61	0.85	-0.20	0.07	0.52	0.84	0.75	0.80	0.18	16.77	0.60	0.94	-0.23	0.11	0.52
0.79	0.88	0.73	0.33	39.46	0.62	0.90	-0.31	0.05	0.52	0.91	0.66	0.74	0.14	8.70	0.55	1.01	-0.31	0.02	0.52
0.83	0.80	0.74	0.30	46.12	0.59	0.94	-0.41	-0.01	0.50	0.97	0.66	0.76	0.13	-6.49	0.57	0.94	-0.22	0.03	0.52
0.76	0.85	0.68	0.29	41.69	0.57	0.97	-0.37	-0.03	0.51	0.94	0.61	0.72	0.10	-10.19	0.55	0.96	-0.21	0.06	0.52
0.81	0.89	0.69	0.31	45.98	0.65	1.01	-0.39	0.04	0.51	0.93	0.73	0.79	0.12	-6.20	0.60	0.84	-0.19	0.04	0.52
0.88	0.62	0.73	0.33	24.48	0.60	0.80	-0.31	0.03	0.53	0.51	0.69	0.38	0.11	-10.46	0.29	0.22	-0.10	0.04	0.54
1.02	0.64	0.66	0.38	38.58	0.57	1.21	-0.46	-0.14	0.53	1.11	0.44	0.72	0.14	0.28	0.57	1.08	-0.40	0.04	0.54
0.99	0.70	0.75	0.37	31.03	0.67	1.03	-0.33	0.03	0.53	0.84	0.70	0.70	0.11	-9.89	0.55	0.71	-0.09	0.07	0.54
0.96	0.81	0.69	0.30	21.30	0.60	1.20	-0.44	-0.08	0.53	1.06	0.53	0.78	0.18	4.50	0.63	1.04	-0.38	0.05	0.54
1.04	0.65	0.59	0.26	14.25	0.57	1.16	-0.30	-0.11	0.52	0.99	0.48	0.66	0.14	2.55	0.54	0.89	-0.19	0.05	0.54
