# Supplementary material for: Effects of exoskeletal gait assistance on the recovery motion following tripping
Source: PLoS One. 2020 Feb 24;15(2):e0229150. doi: 10.1371/journal.pone.0229150 (PMC7039667; doi:10.1371/journal.pone.0229150)
Supplement: S2 Dataset — (CSV) [file pone.0229150.s002.csv]

WS_F	StT_F	TrL_F	ToH_F	KA_F	StL_F	CVx_F	CVz_F	MoS_F	CPz_F	WS_S	StT_S	TrL_S	ToH_S	KA_S	StL_S	CVx_S	CVz_S	MoS_S	CPz_S
1.09	0.80	0.76	0.32	40.65	0.67	1.30	-0.73	-0.07	0.54	1.07	0.49	0.72	0.10	-7.50	0.52	1.02	-0.14	-0.06	0.57
0.97	0.70	0.75	0.36	45.47	0.55	0.96	-0.39	-0.01	0.55	0.83	0.58	0.57	0.08	-20.12	0.42	0.81	-0.15	0.00	0.57
0.96	0.74	0.74	0.37	54.23	0.55	0.97	-0.52	0.02	0.55	0.70	0.70	0.57	0.10	-14.74	0.40	0.56	-0.13	-0.01	0.56
1.07	0.89	0.78	0.35	43.33	0.68	1.22	-0.76	-0.11	0.54	1.10	0.54	0.85	0.10	-5.09	0.61	0.99	-0.20	0.02	0.56
1.02	0.84	0.82	0.35	42.71	0.66	1.25	-0.29	-0.05	0.55	0.98	0.53	0.67	0.09	-8.60	0.48	0.92	-0.17	-0.04	0.57
1.00	0.82	0.64	0.32	41.51	0.61	1.17	-0.58	-0.09	0.55	0.98	0.55	0.73	0.11	0.23	0.53	0.98	-0.15	0.02	0.57
0.97	0.79	0.74	0.35	52.80	0.58	1.06	-0.44	-0.04	0.55	0.84	0.69	0.70	0.09	-14.87	0.51	0.85	-0.15	-0.01	0.57
1.10	0.87	0.75	0.34	57.75	0.68	1.32	-0.84	-0.01	0.54	0.83	0.59	0.74	0.11	-11.80	0.52	0.67	-0.11	0.01	0.57
1.01	0.77	0.82	0.42	59.98	0.55	1.15	-0.62	-0.07	0.54	0.94	0.54	0.63	0.10	-10.16	0.45	0.88	-0.08	-0.07	0.57
1.15	0.65	0.77	0.35	32.65	0.63	1.33	-0.41	-0.24	0.54	1.12	0.48	0.80	0.18	9.32	0.65	1.15	-0.29	-0.06	0.55
1.09	0.78	0.65	0.32	30.02	0.63	1.18	-0.59	-0.17	0.55	0.93	0.55	0.71	0.18	3.99	0.56	0.91	-0.24	-0.07	0.56
1.20	0.65	0.58	0.24	26.40	0.65	1.37	-0.47	-0.22	0.55	1.04	0.53	0.80	0.17	3.60	0.64	1.04	-0.23	-0.06	0.56
1.15	0.61	0.80	0.40	35.28	0.61	1.25	-0.41	-0.15	0.55	1.07	0.54	0.76	0.15	1.11	0.62	1.17	-0.20	-0.08	0.56
1.13	0.67	0.63	0.31	29.14	0.61	1.19	-0.59	-0.17	0.55	0.90	0.54	0.72	0.16	-6.22	0.57	0.92	-0.21	-0.04	0.57
1.24	0.68	0.88	0.41	35.18	0.65	1.42	-0.85	-0.18	0.54	1.01	0.54	0.76	0.16	1.75	0.61	0.94	-0.24	-0.09	0.56
1.23	0.59	0.64	0.31	36.03	0.52	1.16	-0.41	-0.19	0.53	1.18	0.53	0.88	0.23	6.26	0.57	1.24	-0.50	0.03	0.53
0.94	0.66	0.67	0.29	4.46	0.45	0.79	-0.38	0.00	0.53	0.72	0.56	0.53	0.13	-1.76	0.34	0.69	-0.25	0.04	0.54
1.06	0.58	0.63	0.28	12.19	0.51	1.08	-0.32	-0.10	0.54	0.97	0.58	0.64	0.18	3.34	0.48	0.92	-0.25	-0.02	0.55
1.03	0.62	0.78	0.38	17.99	0.49	1.01	-0.35	-0.12	0.54	0.82	0.54	0.61	0.14	-4.36	0.46	0.85	-0.19	0.00	0.55
1.06	0.62	0.72	0.31	9.95	0.50	1.02	-0.28	-0.15	0.54	0.93	0.49	0.60	0.15	-1.93	0.45	0.94	-0.22	-0.02	0.54
0.90	0.58	0.68	0.29	18.73	0.62	0.85	-0.29	-0.01	0.54	0.70	0.70	0.58	0.20	-2.67	0.51	0.59	-0.18	0.04	0.55
0.98	0.68	0.62	0.29	6.18	0.51	0.76	-0.30	-0.09	0.54	0.73	0.55	0.58	0.15	-7.18	0.44	0.90	-0.21	-0.01	0.54
1.02	0.61	0.58	0.32	24.11	0.45	0.84	-0.22	-0.16	0.52	0.88	0.47	0.57	0.14	2.58	0.44	1.07	-0.30	-0.09	0.51
1.05	0.64	0.55	0.31	24.68	0.48	1.03	-0.23	-0.28	0.51	1.12	0.46	0.73	0.17	12.11	0.58	1.25	-0.37	-0.02	0.50
1.05	0.63	0.54	0.26	17.32	0.52	0.98	-0.14	-0.17	0.52	0.98	0.50	0.68	0.14	-2.47	0.54	1.09	-0.23	-0.02	0.52
0.91	0.59	0.61	0.33	32.07	0.49	0.88	-0.27	-0.09	0.52	0.81	0.67	0.66	0.17	5.98	0.49	0.99	-0.13	-0.07	0.51
1.02	0.65	0.58	0.31	26.72	0.50	0.95	-0.21	-0.13	0.51	0.85	0.53	0.67	0.17	17.30	0.52	0.95	-0.21	-0.03	0.50
0.98	0.62	0.66	0.36	33.57	0.51	1.00	-0.32	-0.10	0.51	0.95	0.62	0.71	0.14	-1.15	0.56	1.04	-0.31	-0.05	0.50
1.13	0.78	0.66	0.25	16.16	0.72	1.28	-0.48	-0.10	0.54	1.09	0.53	0.82	0.11	-8.49	0.62	0.96	-0.01	0.01	0.54
1.06	0.74	0.66	0.32	36.07	0.59	1.21	-0.64	-0.19	0.54	0.90	0.49	0.73	0.10	-23.97	0.57	0.88	-0.18	0.08	0.54
0.98	0.69	0.54	0.26	32.90	0.53	0.98	-0.42	-0.10	0.53	0.86	0.48	0.58	0.09	-20.29	0.46	0.90	-0.14	0.00	0.55
1.09	0.65	0.67	0.27	19.67	0.62	1.11	-0.40	-0.07	0.54	1.11	0.47	0.70	0.12	2.98	0.54	1.15	-0.20	-0.07	0.54
1.17	0.78	0.67	0.32	25.69	0.64	1.50	-0.49	-0.28	0.52	1.24	0.48	0.86	0.11	0.36	0.66	1.34	-0.11	-0.14	0.53
1.18	0.61	0.56	0.27	16.83	0.47	1.19	-0.46	-0.30	0.48	1.13	0.43	0.65	0.14	-0.86	0.43	1.20	-0.30	-0.10	0.50
1.07	0.67	0.63	0.33	23.00	0.47	1.13	-0.36	-0.21	0.49	1.19	0.50	0.70	0.17	0.42	0.46	1.31	-0.42	-0.10	0.50
1.14	0.69	0.63	0.32	22.24	0.49	1.23	-0.42	-0.26	0.48	1.12	0.51	0.74	0.17	2.20	0.51	1.19	-0.36	-0.06	0.51
1.15	0.64	0.55	0.19	10.67	0.49	1.22	-0.37	-0.17	0.48	0.91	0.56	0.71	0.22	10.23	0.46	0.79	-0.19	0.00	0.51
1.03	0.66	0.69	0.28	19.19	0.50	1.10	-0.48	-0.20	0.48	0.88	0.55	0.63	0.16	-3.14	0.43	0.83	-0.27	-0.02	0.51
1.13	0.67	0.54	0.32	23.57	0.48	1.22	-0.40	-0.29	0.49	1.06	0.54	0.76	0.18	5.77	0.52	1.15	-0.40	-0.01	0.50
1.00	0.63	0.81	0.36	34.93	0.58	1.03	-0.49	-0.01	0.51	0.95	0.50	0.47	0.09	-20.77	0.37	0.96	-0.35	-0.24	0.53
1.20	0.64	0.76	0.25	12.96	0.65	1.33	-0.21	-0.16	0.52	0.91	0.46	0.55	0.09	-12.67	0.45	0.79	0.00	-0.01	0.54
1.03	0.69	0.75	0.35	22.55	0.58	1.14	-0.43	-0.12	0.52	0.73	0.36	0.35	0.06	-24.08	0.28	0.59	-0.01	-0.06	0.53
1.02	0.64	0.63	0.34	33.72	0.56	1.10	-0.50	-0.20	0.50	1.09	0.44	0.59	0.09	-18.20	0.47	1.11	-0.27	-0.17	0.52
1.06	0.64	0.64	0.32	33.13	0.56	1.16	-0.42	-0.11	0.52	0.97	0.43	0.54	0.12	-6.43	0.43	0.96	-0.38	-0.11	0.52
0.77	0.88	0.68	0.33	38.95	0.62	0.73	-0.32	0.10	0.52	1.01	0.71	0.84	0.14	8.59	0.63	1.09	-0.18	0.06	0.52
0.77	0.74	0.65	0.31	42.91	0.50	0.53	-0.42	0.10	0.52	0.59	0.74	0.59	0.10	-8.81	0.44	0.74	-0.12	0.12	0.53
0.80	0.83	0.72	0.31	48.27	0.56	0.78	-0.70	0.13	0.49	0.77	0.65	0.71	0.15	-1.31	0.52	0.77	-0.15	0.05	0.53
0.98	0.65	0.67	0.32	26.89	0.55	0.85	-0.52	-0.07	0.52	0.84	0.46	0.51	0.10	-8.51	0.39	0.86	-0.25	-0.01	0.54
0.98	0.62	0.62	0.35	38.80	0.55	1.04	-0.30	-0.11	0.53	1.15	0.47	0.67	0.14	-6.36	0.53	1.13	-0.31	-0.07	0.54
1.00	0.74	0.63	0.32	30.84	0.58	1.09	-0.42	-0.11	0.53	1.07	0.54	0.77	0.17	4.20	0.61	1.09	-0.31	0.03	0.54
0.99	0.65	0.55	0.32	33.46	0.54	0.90	-0.40	-0.08	0.53	0.90	0.52	0.59	0.13	-4.36	0.47	0.93	-0.27	-0.01	0.54
0.97	0.66	0.58	0.29	25.41	0.52	0.98	-0.34	-0.10	0.52	0.93	0.56	0.65	0.14	-3.39	0.52	0.95	-0.30	0.03	0.54
0.94	0.67	0.49	0.24	23.10	0.58	0.90	-0.33	0.06	0.54	0.95	0.54	0.64	0.09	10.23	0.61	1.09	-0.15	0.10	0.55
